# Supplementary material
Source: PubMed Central journal article supplement (PMC2696811)
Supplement: NIHMS121090-supplement-1.pdf [file NIHMS121090-supplement-1.pdf]

Figure S1.

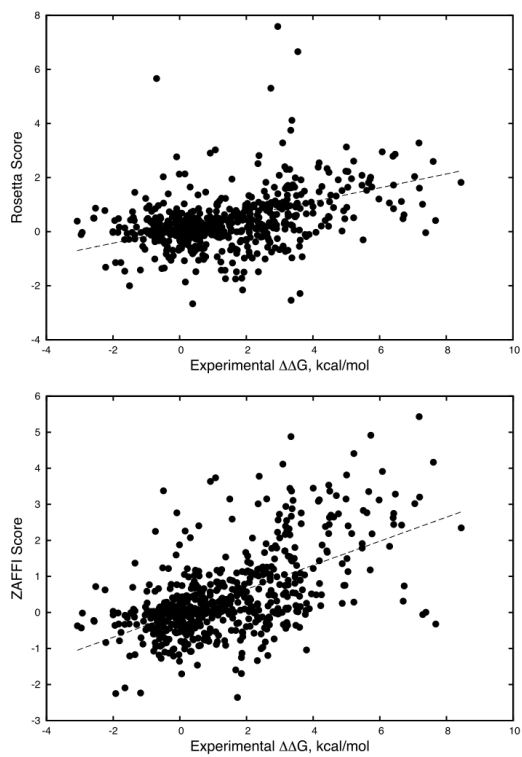

Figure S2.

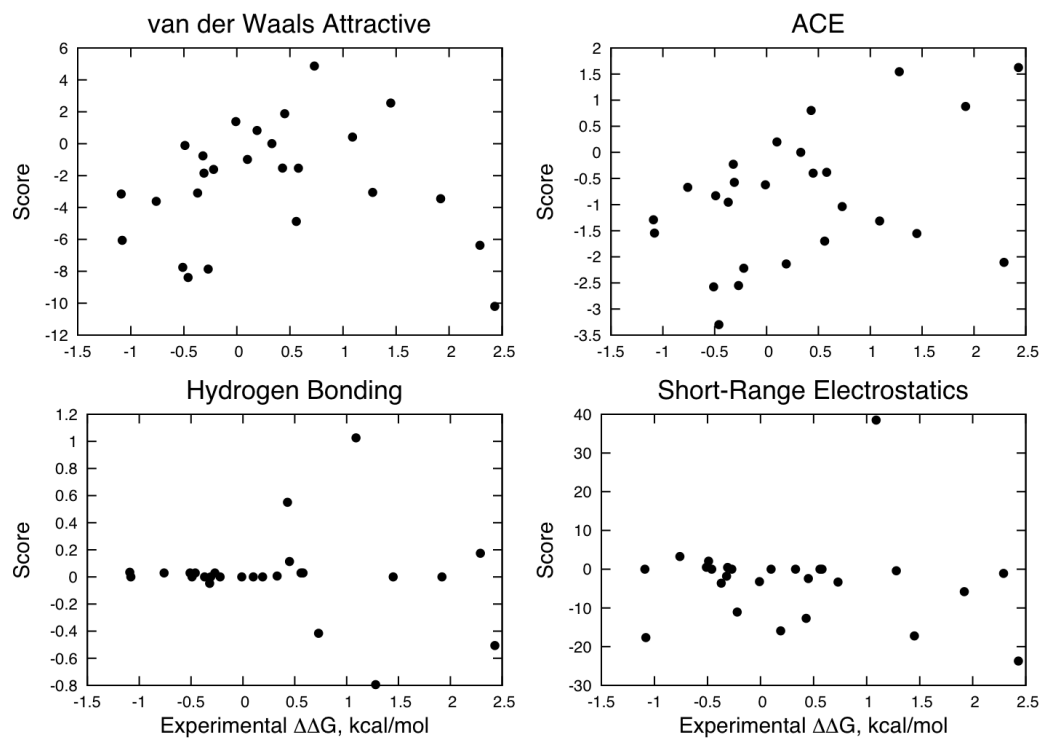

**Figure S3.**

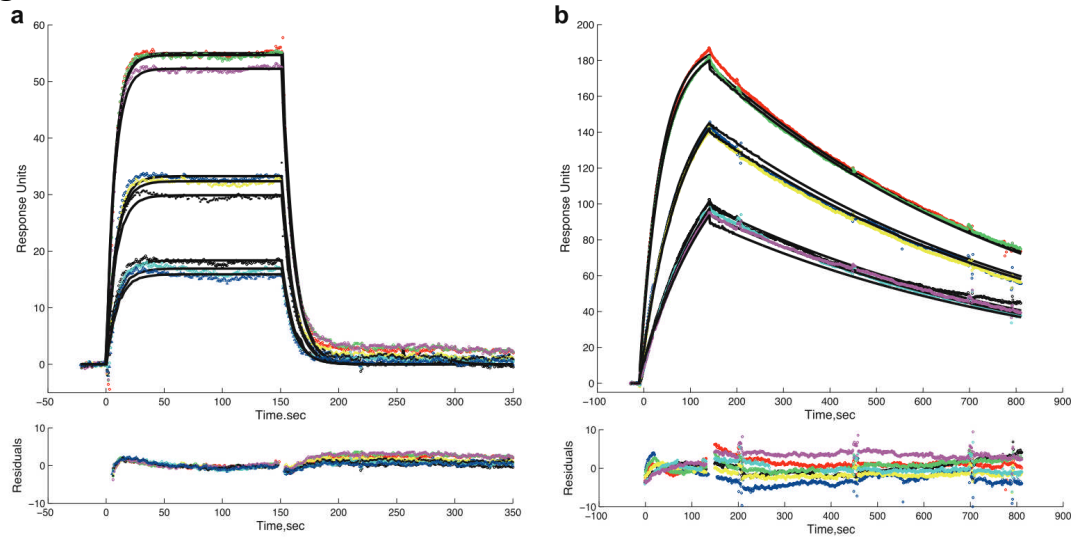

Table S1.

| <b>Mutation</b> | <b>vdW_atr</b> | <b>vdW_rep</b> | <b>Solv</b> | <b>Intra</b> | <b>ACE</b> | <b>Total</b> | <b><math>\Delta\Delta G</math></b> |
|-----------------|----------------|----------------|-------------|--------------|------------|--------------|------------------------------------|
| D26M            | 0.20           | 0.00           | -0.03       | 0.04         | -0.70      | -0.49        | 0.19                               |
| D26V            | 0.61           | 0.01           | -0.22       | 0.00         | -0.51      | -0.11        | 1.45                               |
| D26W            | -1.44          | 0.22           | 0.40        | 0.28         | -0.50      | -1.05        | -1.08                              |
| R27F            | -0.38          | 0.02           | -0.14       | -0.05        | -0.72      | -1.28        | -0.22                              |
| G28A            | -0.37          | 0.01           | 0.02        | 0.00         | -0.12      | -0.46        | 0.58                               |
| G28I            | -1.87          | 0.59           | 0.17        | 1.06         | -0.83      | -0.89        | -0.27                              |
| G28L            | -2.00          | 2.47           | 0.12        | 0.05         | -1.07      | -0.43        | -0.46                              |
| G28M            | -1.85          | 0.17           | 0.65        | -0.01        | -0.84      | -1.88        | -0.51                              |
| G28R            | -2.43          | 0.72           | 2.38        | 0.45         | 0.53       | 1.65         | 2.43                               |
| G28T            | -0.86          | 0.06           | 0.05        | 0.00         | -0.22      | -0.97        | -0.76                              |
| G28V            | -1.16          | 0.41           | 0.10        | 1.72         | -0.55      | 0.52         | 0.56                               |
| S29A            | 0.00           | 0.00           | 0.00        | 0.00         | 0.00       | 0.00         | 0.33                               |
| Q30N            | 1.16           | 0.00           | -0.72       | 0.00         | -0.34      | 0.10         | 0.73                               |
| Q30E            | -0.36          | 0.01           | -0.32       | -0.01        | 0.26       | -0.42        | 0.43                               |
| S51M            | -0.74          | 0.01           | 0.13        | 0.00         | -0.31      | -0.90        | -0.37                              |
| K68H            | 0.10           | 0.00           | -0.48       | -0.01        | -0.43      | -0.83        | 1.09                               |
| S100A           | 0.33           | -0.01          | -0.32       | 0.00         | -0.20      | -0.19        | -0.01                              |
| S100N           | -0.82          | 0.00           | 1.08        | 0.04         | 0.29       | 0.58         | 1.92                               |
| S100T           | -0.03          | 0.00           | -0.16       | 0.00         | -0.27      | -0.46        | -0.49                              |
| S100Y           | -1.52          | 1.43           | 0.85        | 0.17         | -0.68      | 0.26         | 2.29                               |
| I54R            | -0.73          | 0.00           | 0.76        | 0.00         | 0.50       | 0.54         | 1.28                               |
| A99M            | -0.44          | 0.00           | -0.19       | 0.09         | -0.19      | -0.72        | -0.31                              |
| A99K            | -0.24          | 0.00           | 0.03        | 0.00         | 0.06       | -0.14        | 0.10                               |
| G100S           | -0.18          | 0.00           | 0.00        | 0.00         | -0.07      | -0.25        | -0.32                              |
| G101A           | -0.75          | 0.09           | 0.09        | 0.00         | -0.42      | -1.00        | -1.09                              |
| R102Q           | 0.45           | -0.02          | -0.32       | 0.00         | -0.13      | -0.03        | 0.45                               |
